# Supplementary material for: ApiAP2 Factors as Candidate Regulators of Stochastic Commitment to Merozoite Production in Theileria annulata
Source: PubMed Central journal article supplement (PMC4537280; doi:10.1371/journal.pntd.0003933), 2015-08-14
Supplement: pntd.0003933.s001.pdf [file pntd.0003933.s001.pdf]

## S1 Table: List of biotinylated oligonucleotide probes used in EMSA

| Probe name                | Sequence 5'→3'                                                                                 | Description                                                                           |
|---------------------------|------------------------------------------------------------------------------------------------|---------------------------------------------------------------------------------------|
| <b>Bio-2x(A)CACAC(A)</b>  | Bio-GAT <b>ACACACTT</b> TATGC <b>CACACACA</b>                                                  | Target double motif for AP2 domain encoded by TA11145 from upstream region of TA11145 |
| <b>Bio(A)CACAC(A)-MUT</b> | Bio-GATATAGAA <b>TT</b> TATGCAGAA <b>TAT</b>                                                   | Mutated double motif from upstream region of TA11145                                  |
| <b>Bio-GTGTAC</b>         | Bio-AATATTATAA <b>T</b> AGTCGTAGCCA<br>TCAAT <b>GTGTACAC</b> ATGGTAATATAGA<br>TTTTTCGTTTATATT  | Target motif for AP2 domain of TA13515; motif for PBANKA_143750/PFL1085w              |
| <b>Bio-GTGTAC-MUT</b>     | Bio-AATATTATAA <b>T</b> AGTCGTAGCCA<br>TCAATATATA <b>AAAA</b> ATGGTAATATAGA<br>TTTTTCGTTTATATT | Mutated target motif for AP2 domain encoded by TA13515                                |
| <b>Bio-TCTATA</b>         | Bio-ATTGTTAAT <b>T</b> CCCCATCCAGAT<br><b>CTATAAAA</b>                                         | Target TCTATA core motif for the AP2 domain encoded by TA16485.                       |
