# Supplementary material for: ApiAP2 Factors as Candidate Regulators of Stochastic Commitment to Merozoite Production in Theileria annulata
Source: PubMed Central journal article supplement (PMC4537280; doi:10.1371/journal.pntd.0003933), 2015-08-14
Supplement: pntd.0003933.s002.pdf [file pntd.0003933.s002.pdf]

**S2 Table: Top 100 genes displaying elevated expression, macroschizont (Day 0) to merozoite stage (Day 9)**

| Gene ID | Annotation                          | FC   | RP score               | EE   | FDR    |
|---------|-------------------------------------|------|------------------------|------|--------|
| TA05870 | roptry-associated protein, putative | 5.12 | $3.13 \times 10^{-31}$ | 0.00 | 0.0000 |
| TA14665 | hypothetical protein                | 5.13 | $1.41 \times 10^{-30}$ | 0.00 | 0.0000 |
| TA08360 | hypothetical protein, conserved     | 4.64 | $1.69 \times 10^{-28}$ | 0.00 | 0.0000 |
| TA21080 | Map2 kinase, putative               | 4.16 | $2.40 \times 10^{-26}$ | 0.00 | 0.0000 |
| TA05340 | hypothetical protein, conserved     | 4.03 | $1.21 \times 10^{-25}$ | 0.00 | 0.0000 |
| TA16660 | hypothetical protein, conserved     | 3.96 | $2.36 \times 10^{-25}$ | 0.00 | 0.0000 |
| TA05495 | hypothetical protein                | 3.89 | $2.65 \times 10^{-25}$ | 0.00 | 0.0000 |
| TA13045 | hypothetical protein, conserved     | 3.67 | $5.49 \times 10^{-24}$ | 0.00 | 0.0000 |
| TA13825 | hypothetical protein                | 3.63 | $1.28 \times 10^{-23}$ | 0.00 | 0.0000 |
| TA07585 | hypothetical protein                | 3.51 | $2.58 \times 10^{-23}$ | 0.00 | 0.0000 |
| TA19390 | hypothetical protein, conserved     | 3.40 | $1.11 \times 10^{-22}$ | 0.00 | 0.0000 |
| TA18005 | hypothetical protein                | 3.38 | $2.06 \times 10^{-22}$ | 0.00 | 0.0000 |
| TA19040 | hypothetical protein, conserved     | 3.35 | $2.30 \times 10^{-22}$ | 0.00 | 0.0000 |
| TA19445 | hypothetical protein, conserved     | 3.24 | $8.27 \times 10^{-22}$ | 0.00 | 0.0000 |
| TA11905 | hypothetical protein                | 3.43 | $9.64 \times 10^{-22}$ | 0.00 | 0.0000 |
| TA20020 | hypothetical protein, conserved     | 3.08 | $4.25 \times 10^{-21}$ | 0.02 | 0.0013 |
| TA14680 | hypothetical protein                | 3.02 | $9.70 \times 10^{-21}$ | 0.03 | 0.0018 |
| TA21400 | hypothetical protein                | 2.93 | $2.34 \times 10^{-20}$ | 0.04 | 0.0022 |
| TA17325 | integral membrane protein, putative | 2.95 | $2.41 \times 10^{-20}$ | 0.04 | 0.0021 |
| TA16375 | hypothetical protein, conserved     | 2.94 | $3.47 \times 10^{-20}$ | 0.04 | 0.0020 |
| TA05760 | roptry-associated protein, putative | 2.91 | $3.70 \times 10^{-20}$ | 0.05 | 0.0024 |
| TA21395 | hypothetical protein                | 2.95 | $4.08 \times 10^{-20}$ | 0.05 | 0.0023 |
| TA04105 | cysteine proteinase, putative       | 2.90 | $5.75 \times 10^{-20}$ | 0.07 | 0.0030 |
| TA13515 | hypothetical protein, conserved     | 2.88 | $8.26 \times 10^{-20}$ | 0.07 | 0.0029 |
| TA14955 | hypothetical protein                | 2.85 | $1.43 \times 10^{-19}$ | 0.08 | 0.0032 |
| TA13215 | hypothetical protein, conserved     | 2.79 | $1.43 \times 10^{-19}$ | 0.08 | 0.0031 |

|                |                                                                    |      |                        |      |        |
|----------------|--------------------------------------------------------------------|------|------------------------|------|--------|
| <b>TA16485</b> | hypothetical protein, conserved                                    | 2.78 | $2.13 \times 10^{-19}$ | 0.09 | 0.0033 |
| <b>TA11455</b> | hypothetical protein, conserved                                    | 2.76 | $2.77 \times 10^{-19}$ | 0.09 | 0.0032 |
| <b>TA18855</b> | Sfil-subtelomeric fragment related protein family member, putative | 2.79 | $3.15 \times 10^{-19}$ | 0.10 | 0.0035 |
| <b>TA16420</b> | hypothetical protein                                               | 2.83 | $3.28 \times 10^{-19}$ | 0.10 | 0.0033 |
| <b>TA18195</b> | hypothetical protein                                               | 2.75 | $4.13 \times 10^{-19}$ | 0.12 | 0.0039 |
| <b>TA15485</b> | hypothetical protein, conserved                                    | 2.74 | $4.60 \times 10^{-19}$ | 0.13 | 0.0041 |
| <b>TA14205</b> | hypothetical protein                                               | 2.67 | $9.74 \times 10^{-19}$ | 0.16 | 0.0049 |
| <b>TA16155</b> | hypothetical protein                                               | 2.66 | $1.04 \times 10^{-18}$ | 0.16 | 0.0047 |
| <b>TA17100</b> | hypothetical protein                                               | 2.67 | $1.20 \times 10^{-18}$ | 0.17 | 0.0049 |
| <b>TA04660</b> | hypothetical protein, conserved                                    | 2.64 | $1.28 \times 10^{-18}$ | 0.17 | 0.0047 |
| <b>TA21390</b> | Theileria parva Tpr-related protein, putative                      | 2.65 | $1.29 \times 10^{-18}$ | 0.17 | 0.0046 |
| <b>TA11285</b> | hypothetical protein                                               | 2.70 | $1.62 \times 10^{-18}$ | 0.19 | 0.0050 |
| <b>TA17490</b> |                                                                    | 2.65 | $2.07 \times 10^{-18}$ | 0.19 | 0.0049 |
| <b>TA08480</b> | hypothetical protein, conserved                                    | 2.61 | $2.91 \times 10^{-18}$ | 0.21 | 0.0053 |
| <b>TA07985</b> | hypothetical protein                                               | 2.61 | $4.77 \times 10^{-18}$ | 0.22 | 0.0054 |
| <b>TA07025</b> | Tpr-related protein family member, putative                        | 2.56 | $5.58 \times 10^{-18}$ | 0.23 | 0.0055 |
| <b>TA21385</b> | hypothetical protein                                               | 2.54 | $5.62 \times 10^{-18}$ | 0.23 | 0.0054 |
| <b>TA03260</b> | hypothetical protein                                               | 2.53 | $6.10 \times 10^{-18}$ | 0.23 | 0.0052 |
| <b>TA20555</b> | myosin a, putative                                                 | 2.49 | $1.09 \times 10^{-17}$ | 0.30 | 0.0067 |
| <b>TA19610</b> | hypothetical protein, conserved                                    | 2.49 | $1.91 \times 10^{-17}$ | 0.34 | 0.0074 |
| <b>TA14210</b> | hypothetical protein                                               | 2.44 | $1.92 \times 10^{-17}$ | 0.34 | 0.0072 |
| <b>TA07920</b> | hypothetical protein                                               | 2.46 | $2.96 \times 10^{-17}$ | 0.43 | 0.0090 |
| <b>TA15445</b> | Tpr-related protein family member, putative                        | 2.40 | $3.39 \times 10^{-17}$ | 0.48 | 0.0098 |
| <b>TA15620</b> | hypothetical protein                                               | 2.40 | $4.06 \times 10^{-17}$ | 0.52 | 0.0104 |
| <b>TA15625</b> | hypothetical protein                                               | 2.41 | $4.21 \times 10^{-17}$ | 0.52 | 0.0102 |
| <b>TA19275</b> | hypothetical protein                                               | 2.42 | $4.43 \times 10^{-17}$ | 0.53 | 0.0102 |
| <b>TA14285</b> | Sfil-subtelomeric fragment related protein family member, putative | 2.41 | $4.53 \times 10^{-17}$ | 0.53 | 0.0100 |

|                |                                                                    |      |                        |      |        |
|----------------|--------------------------------------------------------------------|------|------------------------|------|--------|
| <b>TA07630</b> | hypothetical protein, conserved                                    | 2.39 | $5.90 \times 10^{-17}$ | 0.56 | 0.0104 |
| <b>TA16685</b> | polymorphic antigen precursor-like protein, putative               | 2.39 | $6.37 \times 10^{-17}$ | 0.56 | 0.0102 |
| <b>TA13890</b> | hypothetical protein                                               | 2.32 | $2.07 \times 10^{-16}$ | 0.83 | 0.0148 |
| <b>TA04565</b> | hypothetical protein                                               | 2.30 | $2.20 \times 10^{-16}$ | 0.84 | 0.0147 |
| <b>TA19505</b> | hypothetical protein, conserved                                    | 2.30 | $2.37 \times 10^{-16}$ | 0.84 | 0.0145 |
| <b>TA17055</b> | hypothetical protein                                               | 2.29 | $2.42 \times 10^{-16}$ | 0.84 | 0.0142 |
| <b>TA08235</b> | hypothetical protein                                               | 2.30 | $2.42 \times 10^{-16}$ | 0.84 | 0.0140 |
| <b>TA14310</b> | hypothetical protein                                               | 2.28 | $3.29 \times 10^{-16}$ | 1.00 | 0.0164 |
| <b>TA13540</b> | hypothetical protein                                               | 2.27 | $3.34 \times 10^{-16}$ | 1.00 | 0.0161 |
| <b>TA17358</b> |                                                                    | 2.25 | $3.82 \times 10^{-16}$ | 1.01 | 0.0160 |
| <b>TA13530</b> | phosphate transporter, putative                                    | 2.25 | $3.97 \times 10^{-16}$ | 1.01 | 0.0158 |
| <b>TA15490</b> | hypothetical protein                                               | 2.25 | $4.84 \times 10^{-16}$ | 1.04 | 0.0160 |
| <b>TA17115</b> | Sfil-subtelomeric fragment related protein family member, putative | 2.25 | $5.20 \times 10^{-16}$ | 1.07 | 0.0162 |
| <b>TA20435</b> | hypothetical protein                                               | 2.23 | $5.44 \times 10^{-16}$ | 1.12 | 0.0167 |
| <b>TA06795</b> | hypothetical protein, conserved                                    | 2.23 | $5.55 \times 10^{-16}$ | 1.14 | 0.0168 |
| <b>TA18275</b> | hypothetical protein                                               | 2.22 | $5.91 \times 10^{-16}$ | 1.17 | 0.0170 |
| <b>TA20150</b> | Theileria-specific hypothetical protein                            | 2.22 | $6.00 \times 10^{-16}$ | 1.17 | 0.0167 |
| <b>TA14130</b> | Tpr-related protein family member, putative                        | 2.23 | $6.31 \times 10^{-16}$ | 1.19 | 0.0168 |
| <b>TA04355</b> | hypothetical protein                                               | 2.19 | $8.91 \times 10^{-16}$ | 1.31 | 0.0182 |
| <b>TA13940</b> | hypothetical protein                                               | 2.21 | $9.32 \times 10^{-16}$ | 1.36 | 0.0186 |
| <b>TA07435</b> | Sfil-subtelomeric fragment related protein family member, putative | 2.15 | $1.15 \times 10^{-15}$ | 1.47 | 0.0199 |
| <b>TA10645</b> | hypothetical protein                                               | 2.18 | $1.20 \times 10^{-15}$ | 1.49 | 0.0199 |
| <b>TA20985</b> | hypothetical protein                                               | 2.15 | $1.30 \times 10^{-15}$ | 1.55 | 0.0204 |
| <b>TA15095</b> | Tpr-related protein family member, putative                        | 2.18 | $1.35 \times 10^{-15}$ | 1.55 | 0.0201 |
| <b>TA15090</b> | Tpr-related protein family member, putative                        | 2.17 | $1.37 \times 10^{-15}$ | 1.55 | 0.0199 |
| <b>TA15355</b> | hypothetical protein                                               | 2.15 | $1.51 \times 10^{-15}$ | 1.62 | 0.0205 |

|                |                                                                       |      |                        |      |        |
|----------------|-----------------------------------------------------------------------|------|------------------------|------|--------|
| <b>TA19675</b> | hypothetical protein                                                  | 2.15 | $1.58 \times 10^{-15}$ | 1.65 | 0.0206 |
| <b>TA17960</b> | hypothetical protein                                                  | 2.15 | $1.62 \times 10^{-15}$ | 1.65 | 0.0204 |
| <b>TA13535</b> | hypothetical protein                                                  | 2.11 | $1.62 \times 10^{-15}$ | 1.65 | 0.0201 |
| <b>TA05375</b> | hypothetical protein                                                  | 2.16 | $1.67 \times 10^{-15}$ | 1.71 | 0.0206 |
| <b>TA14335</b> | hypothetical protein                                                  | 2.15 | $1.72 \times 10^{-15}$ | 1.73 | 0.0206 |
| <b>TA10690</b> | ubiquitin-conjugating enzyme E2.<br>putative                          | 2.12 | $2.36 \times 10^{-15}$ | 1.88 | 0.0221 |
| <b>TA19975</b> | integral membrane protein, putative                                   | 2.11 | $2.73 \times 10^{-15}$ | 1.95 | 0.0227 |
| <b>TA03850</b> | Tpr-related protein family member,<br>putative                        | 2.13 | $2.85 \times 10^{-15}$ | 1.98 | 0.0228 |
| <b>TA14120</b> | Tpr-related protein family member,<br>putative                        | 2.09 | $3.18 \times 10^{-15}$ | 2.04 | 0.0232 |
| <b>TA03540</b> | hypothetical protein                                                  | 2.06 | $3.40 \times 10^{-15}$ | 2.12 | 0.0238 |
| <b>TA14135</b> | Tpr-related protein family member,<br>putative                        | 2.10 | $3.87 \times 10^{-15}$ | 2.15 | 0.0239 |
| <b>TA03755</b> | sporozoite surface antigen (spag -1)                                  | 2.08 | $3.87 \times 10^{-15}$ | 2.15 | 0.0236 |
| <b>TA17500</b> | Sfil-subtelomeric fragment related<br>protein family member, putative | 2.09 | $3.92 \times 10^{-15}$ | 2.16 | 0.0235 |
| <b>TA13345</b> | hypothetical protein                                                  | 2.07 | $5.14 \times 10^{-15}$ | 2.32 | 0.0250 |
| <b>TA19575</b> | hypothetical protein, conserved                                       | 2.06 | $5.66 \times 10^{-15}$ | 2.37 | 0.0252 |
| <b>TA09600</b> | Tpr-related protein family member,<br>putative                        | 2.01 | $7.70 \times 10^{-15}$ | 2.61 | 0.0275 |
| <b>TA03480</b> | hypothetical protein, conserved                                       | 2.03 | $8.04 \times 10^{-15}$ | 2.61 | 0.0272 |
| <b>TA19075</b> | hypothetical protein                                                  | 2.03 | $8.17 \times 10^{-15}$ | 2.63 | 0.0271 |
| <b>TA21050</b> | hypothetical protein                                                  | 2.02 | $8.20 \times 10^{-15}$ | 2.63 | 0.0268 |
| <b>TA03855</b> | Tpr-related protein family member,<br>putative                        | 2.03 | $9.80 \times 10^{-15}$ | 2.74 | 0.0277 |
| <b>TA12015</b> | hypothetical protein                                                  | 2.00 | $1.02 \times 10^{-14}$ | 2.79 | 0.0279 |

---
