# Supplementary material for: ApiAP2 Factors as Candidate Regulators of Stochastic Commitment to Merozoite Production in Theileria annulata
Source: PubMed Central journal article supplement (PMC4537280; doi:10.1371/journal.pntd.0003933), 2015-08-14
Supplement: pntd.0003933.s003.pdf [file pntd.0003933.s003.pdf]

**S3 Table: Top 100 genes displaying reduced expression, macroschizont (Day 0) to merozoite stage (Day 9)**

| Gene ID | Annotation                                                        | FC    | RP score               | EE   | FDR    |
|---------|-------------------------------------------------------------------|-------|------------------------|------|--------|
| TA19865 | surface protein d precursor                                       | -3.38 | $7.04 \times 10^{-31}$ | 0.00 | 0.0000 |
| TA11410 | Theileria-specific sub-telomeric protein, SVSP family, putative   | -3.20 | $1.01 \times 10^{-28}$ | 0.00 | 0.0000 |
| TA11405 | subtelomeric sfi-fragment-related protein family member, putative | -3.12 | $6.57 \times 10^{-28}$ | 0.00 | 0.0000 |
| TA15705 | hypothetical protein (ta9)                                        | -3.10 | $2.17 \times 10^{-27}$ | 0.00 | 0.0000 |
| TA09805 | Theileria-specific sub-telomeric protein, SVSP family             | -2.93 | $7.76 \times 10^{-26}$ | 0.00 | 0.0000 |
| TA10505 | hypothetical protein                                              | -2.91 | $1.76 \times 10^{-25}$ | 0.00 | 0.0000 |
| TA09790 | Theileria-specific sub-telomeric protein, SVSP family             | -2.69 | $8.78 \times 10^{-24}$ | 0.00 | 0.0000 |
| TA18010 | integral membrane protein, putative                               | -2.69 | $1.44 \times 10^{-23}$ | 0.00 | 0.0000 |
| TA09420 | Theileria-specific sub-telomeric protein, SVSP family, putative   | -2.61 | $2.04 \times 10^{-23}$ | 0.00 | 0.0000 |
| TA02480 | hexose transporter (HT1 homologue), putative                      | -2.61 | $3.93 \times 10^{-23}$ | 0.00 | 0.0000 |
| TA05580 | Theileria-specific sub-telomeric protein, SVSP family             | -2.59 | $4.48 \times 10^{-23}$ | 0.00 | 0.0000 |
| TA15695 | hypothetical protein                                              | -2.64 | $4.76 \times 10^{-23}$ | 0.00 | 0.0000 |
| TA09810 | Theileria-specific sub-telomeric protein, SVSP family             | -2.54 | $6.70 \times 10^{-23}$ | 0.00 | 0.0000 |
| TA09435 | Theileria-specific sub-telomeric protein, SVSP family, putative   | -2.52 | $3.11 \times 10^{-22}$ | 0.00 | 0.0000 |
| TA15710 | hypothetical protein                                              | -2.50 | $4.99 \times 10^{-22}$ | 0.00 | 0.0000 |
| TA18895 | conserved Theileria-specific sub-telomeric protein, SVSP family   | -2.43 | $7.76 \times 10^{-22}$ | 0.00 | 0.0000 |
| TA09430 | Theileria-specific sub-telomeric protein, SVSP family, putative   | -2.40 | $1.95 \times 10^{-21}$ | 0.01 | 0.0006 |
| TA17555 | Theileria-specific sub-telomeric protein, SVSP family             | -2.40 | $2.15 \times 10^{-21}$ | 0.01 | 0.0006 |

|                |                                                                    |       |                        |      |        |
|----------------|--------------------------------------------------------------------|-------|------------------------|------|--------|
| <b>TA11940</b> | hypothetical protein                                               | -2.39 | $2.68 \times 10^{-21}$ | 0.01 | 0.0005 |
| <b>TA09815</b> | Sfil-subtelomeric fragment related protein family member, putative | -2.36 | $3.82 \times 10^{-21}$ | 0.02 | 0.0010 |
| <b>TA09800</b> | Theileria-specific sub-telomeric protein, SVSP family              | -2.37 | $4.30 \times 10^{-21}$ | 0.02 | 0.0010 |
| <b>TA10530</b> | hypothetical protein                                               | -2.35 | $5.18 \times 10^{-21}$ | 0.02 | 0.0009 |
| <b>TA17545</b> | Theileria-specific sub-telomeric protein, SVSP family              | -2.25 | $4.52 \times 10^{-20}$ | 0.05 | 0.0022 |
| <b>TA05575</b> | Theileria-specific sub-telomeric protein, SVSP family              | -2.24 | $5.32 \times 10^{-20}$ | 0.05 | 0.0021 |
| <b>TA19005</b> | conserved Theileria-specific sub-telomeric protein, SVSP family    | -2.23 | $7.05 \times 10^{-20}$ | 0.07 | 0.0028 |
| <b>TA17125</b> | Theileria-specific sub-telomeric protein, SVSP family              | -2.19 | $1.21 \times 10^{-19}$ | 0.08 | 0.0031 |
| <b>TA09505</b> | Sfil-subtelomeric fragment related protein family member, putative | -2.18 | $2.01 \times 10^{-19}$ | 0.09 | 0.0033 |
| <b>TA18890</b> | conserved Theileria-specific sub-telomeric protein, SVSP family    | -2.17 | $2.72 \times 10^{-19}$ | 0.09 | 0.0032 |
| <b>TA20095</b> | Tashat2 protein                                                    | -2.13 | $6.55 \times 10^{-19}$ | 0.15 | 0.0052 |
| <b>TA02905</b> | hypothetical protein                                               | -2.04 | $8.61 \times 10^{-19}$ | 0.16 | 0.0053 |
| <b>TA16035</b> | Theileria-specific sub-telomeric protein, SVSP family, putative    | -2.09 | $8.76 \times 10^{-19}$ | 0.16 | 0.0052 |
| <b>TA16030</b> | Theileria-specific sub-telomeric protein, SVSP family, putative    | -2.07 | $1.10 \times 10^{-18}$ | 0.17 | 0.0053 |
| <b>TA09510</b> | Sfil-subtelomeric fragment related protein family member, putative | -1.98 | $1.21 \times 10^{-18}$ | 0.17 | 0.0052 |
| <b>TA12265</b> | Sfil-subtelomeric fragment related protein family member, putative | -2.08 | $1.23 \times 10^{-18}$ | 0.17 | 0.0050 |
| <b>TA11945</b> | hypothetical protein                                               | -2.06 | $1.73 \times 10^{-18}$ | 0.19 | 0.0054 |
| <b>TA04675</b> | hypothetical protein                                               | -1.98 | $1.93 \times 10^{-18}$ | 0.19 | 0.0053 |
| <b>TA11400</b> | Sfil-subtelomeric fragment related protein family member, putative | -2.05 | $2.20 \times 10^{-18}$ | 0.20 | 0.0054 |
| <b>TA16090</b> | glutenin, putative                                                 | -1.97 | $2.95 \times 10^{-18}$ | 0.21 | 0.0055 |

|                |                                                                    |       |                        |      |        |
|----------------|--------------------------------------------------------------------|-------|------------------------|------|--------|
| <b>TA17485</b> | hypothetical protein                                               | -1.90 | $4.18 \times 10^{-18}$ | 0.21 | 0.0054 |
| <b>TA05540</b> | Theileria-specific sub-telomeric protein, SVSP family              | -2.01 | $5.41 \times 10^{-18}$ | 0.23 | 0.0058 |
| <b>TA10420</b> | hypothetical protein                                               | -1.93 | $5.90 \times 10^{-18}$ | 0.23 | 0.0056 |
| <b>TA05960</b> | Tpr-related protein family member, putative                        | -1.88 | $7.87 \times 10^{-18}$ | 0.28 | 0.0067 |
| <b>TA18950</b> | conserved Theileria-specific sub-telomeric protein, SVSP family    | -1.96 | $1.15 \times 10^{-17}$ | 0.30 | 0.0070 |
| <b>TA15015</b> | Tpr-related protein family member, putative                        | -1.94 | $1.31 \times 10^{-17}$ | 0.30 | 0.0068 |
| <b>TA05565</b> | Theileria-specific sub-telomeric protein, SVSP family              | -1.93 | $2.12 \times 10^{-17}$ | 0.37 | 0.0082 |
| <b>TA18865</b> | conserved Theileria-specific sub-telomeric protein, SVSP family    | -1.93 | $2.15 \times 10^{-17}$ | 0.37 | 0.0080 |
| <b>TA17915</b> | hypothetical protein                                               | -1.82 | $2.96 \times 10^{-17}$ | 0.43 | 0.0091 |
| <b>TA16025</b> | Theileria-specific sub-telomeric protein, SVSP family, putative    | -1.91 | $3.02 \times 10^{-17}$ | 0.43 | 0.0090 |
| <b>TA07475</b> | Sfil-subtelomeric fragment related protein family member, putative | -1.81 | $3.60 \times 10^{-17}$ | 0.49 | 0.0100 |
| <b>TA18540</b> | hypothetical protein                                               | -1.77 | $3.99 \times 10^{-17}$ | 0.51 | 0.0102 |
| <b>TA05150</b> | hypothetical protein, conserved                                    | -1.87 | $5.19 \times 10^{-17}$ | 0.54 | 0.0106 |
| <b>TA17375</b> | polymorphic antigen precursor, putative                            | -1.79 | $5.83 \times 10^{-17}$ | 0.56 | 0.0108 |
| <b>TA11950</b> | hypothetical P-, Q-rich protein family protein, putative           | -1.78 | $6.87 \times 10^{-17}$ | 0.56 | 0.0106 |
| <b>TA16185</b> | haloacid dehalogenase-like family hydrolase, putative              | -1.78 | $7.17 \times 10^{-17}$ | 0.59 | 0.0109 |
| <b>TA09425</b> | Theileria-specific sub-telomeric protein, SVSP family, putative    | -1.84 | $9.61 \times 10^{-17}$ | 0.67 | 0.0122 |
| <b>TA11385</b> | Theileria-specific sub-telomeric protein, SVSP family, putative    | -1.84 | $1.03 \times 10^{-16}$ | 0.67 | 0.0120 |
| <b>TA17120</b> | Theileria-specific sub-telomeric protein, SVSP family              | -1.83 | $1.34 \times 10^{-16}$ | 0.71 | 0.0125 |
| <b>TA04470</b> | hypothetical protein                                               | -1.72 | $1.68 \times 10^{-16}$ | 0.81 | 0.0140 |
| <b>TA05560</b> | Theileria-specific sub-telomeric protein, SVSP family              | -1.77 | $2.21 \times 10^{-16}$ | 0.84 | 0.0142 |

|                |                                                                    |       |                        |      |        |
|----------------|--------------------------------------------------------------------|-------|------------------------|------|--------|
| <b>TA19060</b> | conserved Theileria-specific sub-telomeric protein, SVSP family    | -1.72 | $2.22 \times 10^{-16}$ | 0.84 | 0.0140 |
| <b>TA05965</b> | Tpr-related protein family member, putative                        | -1.65 | $2.22 \times 10^{-16}$ | 0.84 | 0.0138 |
| <b>TA05555</b> | Theileria-specific sub-telomeric protein, SVSP family              | -1.77 | $2.31 \times 10^{-16}$ | 0.84 | 0.0135 |
| <b>TA10655</b> | hypothetical protein, conserved                                    | -1.71 | $2.50 \times 10^{-16}$ | 0.85 | 0.0135 |
| <b>TA17550</b> | Theileria-specific sub-telomeric protein, SVSP family              | -1.78 | $2.56 \times 10^{-16}$ | 0.87 | 0.0136 |
| <b>TA05570</b> | Theileria-specific sub-telomeric protein, SVSP family              | -1.79 | $2.64 \times 10^{-16}$ | 0.89 | 0.0137 |
| <b>TA03125</b> | Tash1-like protein, putative                                       | -1.69 | $2.89 \times 10^{-16}$ | 0.94 | 0.0142 |
| <b>TA11415</b> | Sfil-subtelomeric fragment related protein family member, putative | -1.77 | $3.73 \times 10^{-16}$ | 1.01 | 0.0151 |
| <b>TA17540</b> | Theileria-specific sub-telomeric protein, SVSP family              | -1.76 | $3.77 \times 10^{-16}$ | 1.01 | 0.0149 |
| <b>TA13350</b> | hypothetical protein                                               | -1.74 | $4.01 \times 10^{-16}$ | 1.01 | 0.0146 |
| <b>TA04895</b> | hypothetical protein, conserved                                    | -1.61 | $4.98 \times 10^{-16}$ | 1.05 | 0.0150 |
| <b>TA15580</b> | hypothetical protein                                               | -1.57 | $5.57 \times 10^{-16}$ | 1.14 | 0.0161 |
| <b>TA11935</b> | hypothetical protein                                               | -1.75 | $5.69 \times 10^{-16}$ | 1.16 | 0.0161 |
| <b>TA03120</b> | Tash-like protein, putative                                        | -1.64 | $5.84 \times 10^{-16}$ | 1.17 | 0.0160 |
| <b>TA16555</b> | hypothetical protein                                               | -1.62 | $6.38 \times 10^{-16}$ | 1.19 | 0.0161 |
| <b>TA05545</b> | Theileria-specific sub-telomeric protein, SVSP family              | -1.72 | $8.30 \times 10^{-16}$ | 1.29 | 0.0172 |
| <b>TA13965</b> | hypothetical protein                                               | -1.55 | $1.14 \times 10^{-15}$ | 1.46 | 0.0192 |
| <b>TA09785</b> | Theileria-specific sub-telomeric protein, SVSP family              | -1.70 | $1.30 \times 10^{-15}$ | 1.54 | 0.0200 |
| <b>TA17535</b> | Theileria-specific sub-telomeric protein, SVSP family              | -1.64 | $1.31 \times 10^{-15}$ | 1.55 | 0.0199 |
| <b>TA16820</b> | hypothetical protein                                               | -1.57 | $1.54 \times 10^{-15}$ | 1.62 | 0.0205 |
| <b>TA10865</b> | Tpr-related protein family member, putative                        | -1.55 | $1.56 \times 10^{-15}$ | 1.64 | 0.0205 |
| <b>TA03535</b> | hypothetical protein                                               | -1.63 | $1.61 \times 10^{-15}$ | 1.65 | 0.0204 |
| <b>TA09865</b> | Theileria-specific sub-telomeric                                   | -1.60 | $2.04 \times 10^{-15}$ | 1.77 | 0.0216 |

protein, SVSP family

|                |                                                                 |       |                        |      |        |
|----------------|-----------------------------------------------------------------|-------|------------------------|------|--------|
| <b>TA12370</b> | hypothetical protein, conserved                                 | -1.52 | $2.49 \times 10^{-15}$ | 1.92 | 0.0231 |
| <b>TA17346</b> | hypothetical protein                                            | -1.48 | $3.44 \times 10^{-15}$ | 2.12 | 0.0252 |
| <b>TA04550</b> | hypothetical protein                                            | -1.49 | $3.81 \times 10^{-15}$ | 2.14 | 0.0252 |
| <b>TA10735</b> | GATA-specific transcription factor, putative                    | -1.50 | $4.85 \times 10^{-15}$ | 2.28 | 0.0265 |
| <b>TA10755</b> | hypothetical protein, conserved                                 | -1.47 | $5.10 \times 10^{-15}$ | 2.32 | 0.0267 |
| <b>TA09025</b> | hypothetical protein, conserved                                 | -1.45 | $5.73 \times 10^{-15}$ | 2.37 | 0.0269 |
| <b>TA03145</b> | Tash1-like protein, putative                                    | -1.53 | $5.91 \times 10^{-15}$ | 2.39 | 0.0269 |
| <b>TA08365</b> | hypothetical protein                                            | -1.44 | $7.29 \times 10^{-15}$ | 2.54 | 0.0282 |
| <b>TA12635</b> | Theileria-specific hypothetical protein family member, putative | -1.43 | $7.89 \times 10^{-15}$ | 2.61 | 0.0287 |
| <b>TA09795</b> | Theileria-specific sub-telomeric protein, SVSP family           | -1.56 | $9.30 \times 10^{-15}$ | 2.72 | 0.0296 |
| <b>TA11390</b> | Theileria-specific sub-telomeric protein, SVSP family, putative | -1.47 | $1.43 \times 10^{-14}$ | 3.07 | 0.0330 |
| <b>TA11960</b> | hypothetical P-,Q-rich family protein, putative                 | -1.41 | $1.88 \times 10^{-14}$ | 3.34 | 0.0355 |
| <b>TA10770</b> | hypothetical protein, conserved                                 | -1.36 | $2.18 \times 10^{-14}$ | 3.51 | 0.0369 |
| <b>TA12945</b> | hypothetical protein, conserved                                 | -1.39 | $2.32 \times 10^{-14}$ | 3.54 | 0.0369 |
| <b>TA12525</b> | Theileria-specific hypothetical protein family member, putative | -1.35 | $2.87 \times 10^{-14}$ | 3.75 | 0.0387 |
| <b>TA06330</b> | Tpr-related protein family member, putative                     | -1.35 | $3.54 \times 10^{-14}$ | 4.08 | 0.0416 |
| <b>TA06060</b> | hypothetical protein, conserved                                 | -1.35 | $3.79 \times 10^{-14}$ | 4.26 | 0.0430 |
| <b>TA10800</b> | hypothetical protein, conserved                                 | -1.35 | $4.20 \times 10^{-14}$ | 4.39 | 0.0439 |

---
