# Supplementary material for: ApiAP2 Factors as Candidate Regulators of Stochastic Commitment to Merozoite Production in Theileria annulata
Source: PubMed Central journal article supplement (PMC4537280; doi:10.1371/journal.pntd.0003933), 2015-08-14
Supplement: pntd.0003933.s004.pdf [file pntd.0003933.s004.pdf]

**S4 Table: Differential expression of TaApiAP2 genes between infected cell lines, D7 versus D7B12**

| <b>Gene ID</b> | <b>D7 vs D7B12<br/>Fold change</b> | <b>D7 vs D7B12<br/>False discovery rate</b> |
|----------------|------------------------------------|---------------------------------------------|
| TA07550        | 3.23                               | 0.01                                        |
| TA13395        | 1.10                               | 1.20                                        |
| TA07100        | 1.13                               | 1.21                                        |
| TA19920        | 1.13                               | 1.21                                        |
| TA18095        | 1.14                               | 1.21                                        |
| TA02615        | 1.51                               | 0.82                                        |
| TA09965        | 1.55                               | 0.75                                        |
| TA16535        | 1.66                               | 0.49                                        |
| TA11665        | 2.00                               | 0.21                                        |
| TA11145        | 3.95                               | 0.01                                        |
| TA04435        | 7.38                               | 0.00                                        |
| TA16485        | 1.45                               | 0.81                                        |
| TA17415        | 1.56                               | 0.74                                        |
| TA16105        | 2.42                               | 0.06                                        |
| TA08375        | 1.72                               | 0.47                                        |
| TA12015        | 1.79                               | 0.41                                        |
| TA05055        | 1.51                               | 0.79                                        |
| TA04145        | 1.00                               | 1.02                                        |
| TA13515        | 1.87                               | 0.32                                        |
