# Supplementary material for: ApiAP2 Factors as Candidate Regulators of Stochastic Commitment to Merozoite Production in Theileria annulata
Source: PubMed Central journal article supplement (PMC4537280; doi:10.1371/journal.pntd.0003933), 2015-08-14

**S2 Figure: Alignment of paralogous AP2 domains encoded by four genes upregulated during merogony in *T. annulata***

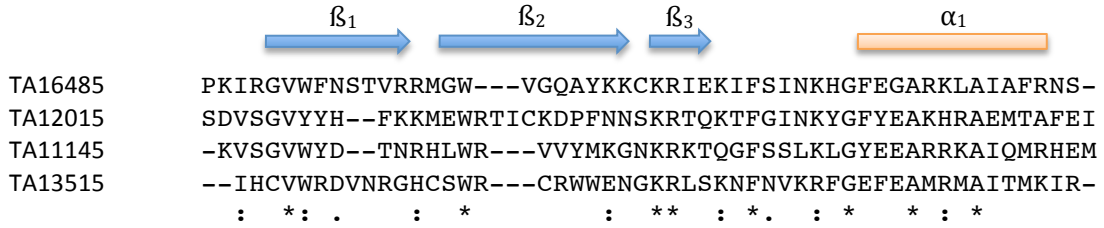

Supplement: pntd.0003933.s006.pdf [file pntd.0003933.s006.pdf]
