# Supplementary material for: ApiAP2 Factors as Candidate Regulators of Stochastic Commitment to Merozoite Production in Theileria annulata
Source: PubMed Central journal article supplement (PMC4537280; doi:10.1371/journal.pntd.0003933), 2015-08-14

### S3 Figure: Correlation plots of ApiAP2 gene expression and putative target genes of the binding domain

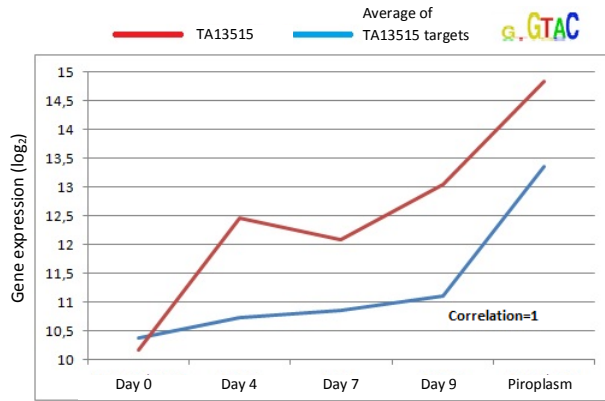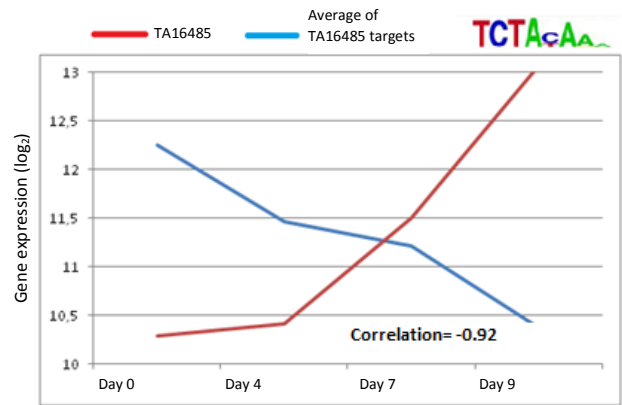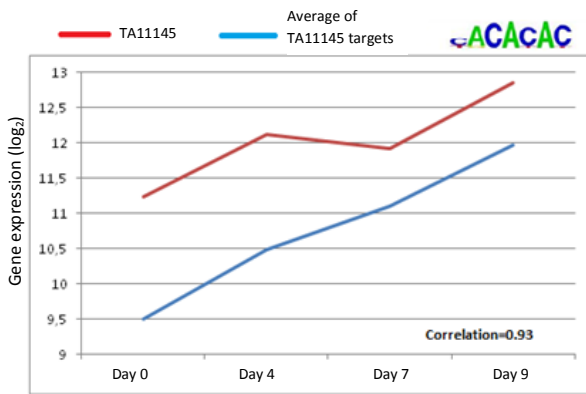

Supplement: pntd.0003933.s007.pdf [file pntd.0003933.s007.pdf]
