# Supplementary material for: ApiAP2 Factors as Candidate Regulators of Stochastic Commitment to Merozoite Production in Theileria annulata
Source: PubMed Central journal article supplement (PMC4537280; doi:10.1371/journal.pntd.0003933), 2015-08-14

## S4 Figure: EMSA of GST-AP2 domain fusion protein TA16485

Probe: TCTATA core motif

1 2 3 4

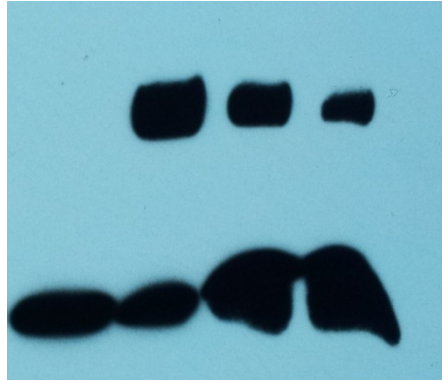

Supplement: pntd.0003933.s008.pdf [file pntd.0003933.s008.pdf]
