# Supplementary material for: ApiAP2 Factors as Candidate Regulators of Stochastic Commitment to Merozoite Production in Theileria annulata
Source: PubMed Central journal article supplement (PMC4537280; doi:10.1371/journal.pntd.0003933), 2015-08-14

**S6 Figure: EMSA of double (A)CACAC(A) motif probe and nuclear extract from uninfected BL20 and PNE, Day 9**

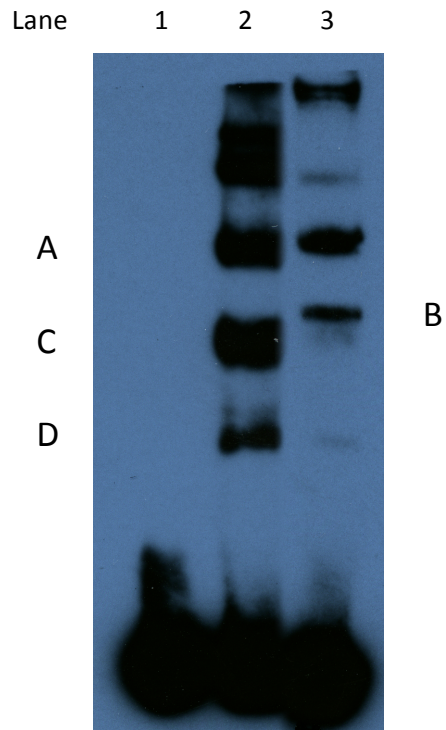

Supplement: pntd.0003933.s010.pdf [file pntd.0003933.s010.pdf]
