# Supplementary material for: ApiAP2 Factors as Candidate Regulators of Stochastic Commitment to Merozoite Production in Theileria annulata
Source: PubMed Central journal article supplement (PMC4537280; doi:10.1371/journal.pntd.0003933), 2015-08-14
Supplement: pntd.0003933.s011.pdf [file pntd.0003933.s011.pdf]

## S7 Figure: Region upstream of AP2 domain gene *TA11145*

TTTTCCCAAATTTCTTAATTTATTTTATTCAAATTTAGTTAAACATATATCTTATTTTA  
AGAAAAATATAGAACATAAATGTGTAAATTAATCTTGAAGTTTTTGATAATATTATGGAA  
GAAGAT**ACACAC**TTATG**CACACAC**AGATTCTTTTCAAAAACACCAAGGTATATGAATGGA  
TTATGTGTCTTAACAAGGAATAATTAACAAAAATGATTATTTAAGGTTAAATTATTGGAA  
AATTAATAAGTTTTATAAGAAATAAATAGAATGTGTAAGATGAAT**ACACAC**TTTGAAATTT  
TGATTTAAAAATTGAAAATTAACAGAAAATATTTTAAAAAATGTAAAATAACACAATAAA  
AAGTGGTCAAACGATAGAATTAAGGAAATCTTGAGAAATGATTGATTTAGATTTAATG  
TGTAGAAAAAGAAAGGGAAATCTCAAGGAAACAAGGACCCAAAAGTCTGGAAGACAGGA  
CATTTTAATAACATTATAAATTATATTAAGATAGAAACATAATAATTTTCTAATGATGGA  
AGGAATTC AAGGACTTTACAGAATAACATAATATTGGGAGATTCGGAGAATGGAATTTGG  
GGCGTGAGCCATATTAACCTGTCTGCATTACGAATATTTAAATAACTGCTTAACACTGA  
TTCTCTCAAGTGTTAACATTAGTTTATACACTATATTTTCTATAATTAATATTTAATTTT  
CACCTCTAGTATCCATTTTATTAGGTGTCGTGAAACACCTCTGTTCCCTTCACTTGACACT  
TTTAATTTCTCGTACACATCGTTAACTTATACAATAAAAAGGATATAAACAATTTGATA  
ATTAATTTAAACCACAAAGATACGGTATTTGTAAGCCCTTTTATTTCT**TGTGTG**ACCACGA  
TGGCGACTTGCCTTTTTTAGATTTTCCCAAACATTTCTTCATTATTTTAATTTAAAATA  
TTTTGGCAAAGTATCACGTGTAATTCCAAATATTTATAGTATTAATTTTTGGTATTTT  
TCTTTAATGCAATCACTGTAATATTTTGTATTTTAATAATTTAAACCTGGAGCCGACATT  
GTTCAAATTTGGATCATAACATTCGCTTTGAATGATAGTTGCTAATATTTTAATAAGATG  
ACCTTTTAAACTCATATAACCCCGAGATTTGGTTACAGATA**ACACAC**TTTAAATCTTG  
TAACAAAGTTAGCTGGAAGGGTAAATGTCGAGTACGTACGCCTCACTTCTTAAACAATA  
CAATAATTAATGAACTTAATAATAACACAAAACAAGTGTCAATTGATGACAAATGATAC  
ACATAAG**ACACACA**GTATGAGTATCA**ACACACA**AATGTATTAATAGACAACTTACTGA  
GAAAATAACTATATAGAATAAACTAACCTACAATTCAGTACGAGAAATTTAATTTAAATA  
TAAACTGAAGTTAATTTTATCAACATAGAAATGAAATTTGAGGTTTTGTAATTTTAA  
TCTCAAGTTTATATATTTATCATG
