# Supplementary material for: ApiAP2 Factors as Candidate Regulators of Stochastic Commitment to Merozoite Production in Theileria annulata
Source: PubMed Central journal article supplement (PMC4537280; doi:10.1371/journal.pntd.0003933), 2015-08-14

**S8 Figure: Alignment of ApiAP2 domain encoded by *TA07100* with orthologues in other *Theileria*, *Plasmodium* and *Babesia***

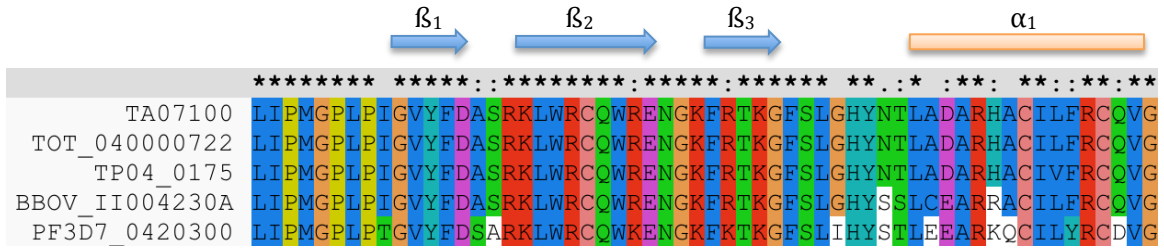

Supplement: pntd.0003933.s012.pdf [file pntd.0003933.s012.pdf]
