# Supplementary material for: ApiAP2 Factors as Candidate Regulators of Stochastic Commitment to Merozoite Production in Theileria annulata
Source: PubMed Central journal article supplement (PMC4537280; doi:10.1371/journal.pntd.0003933), 2015-08-14

Figure S9: qRTR PCR data for ApiAP2 domainR encoding gene *TA13515* (TaAP2.g)

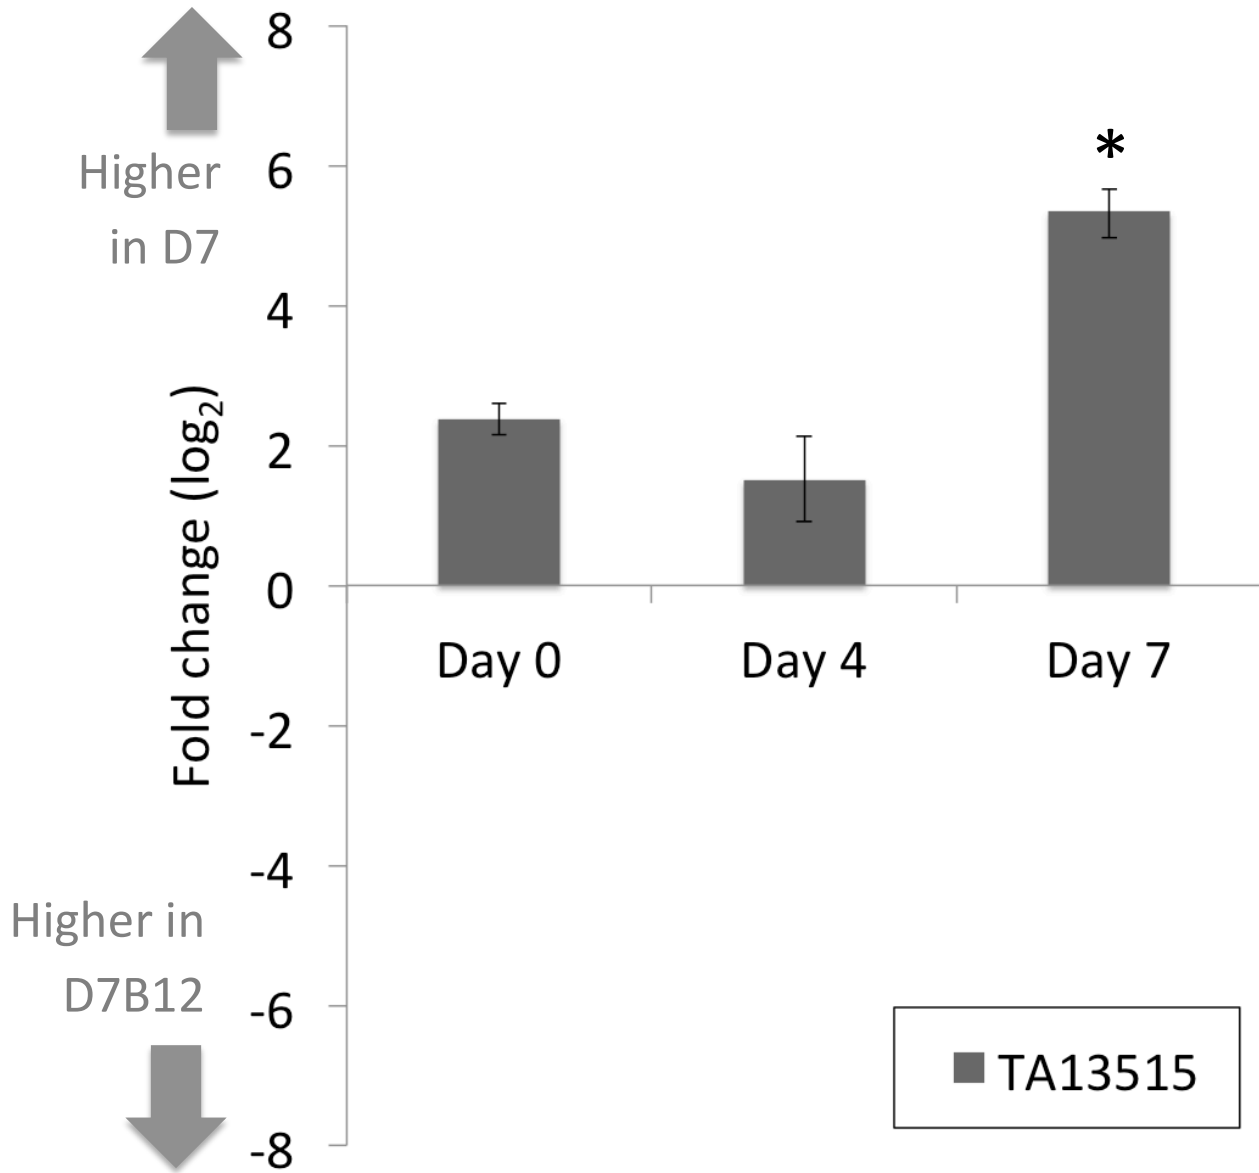

Supplement: pntd.0003933.s013.pdf [file pntd.0003933.s013.pdf]
