# Supplementary material for: ApiAP2 Factors as Candidate Regulators of Stochastic Commitment to Merozoite Production in Theileria annulata
Source: PubMed Central journal article supplement (PMC4537280; doi:10.1371/journal.pntd.0003933), 2015-08-14

**S10 Figure: EMSA of GSTR AP2 domain fusion proteins:  
TA11145, TA13515, TA12015 and TA16485**

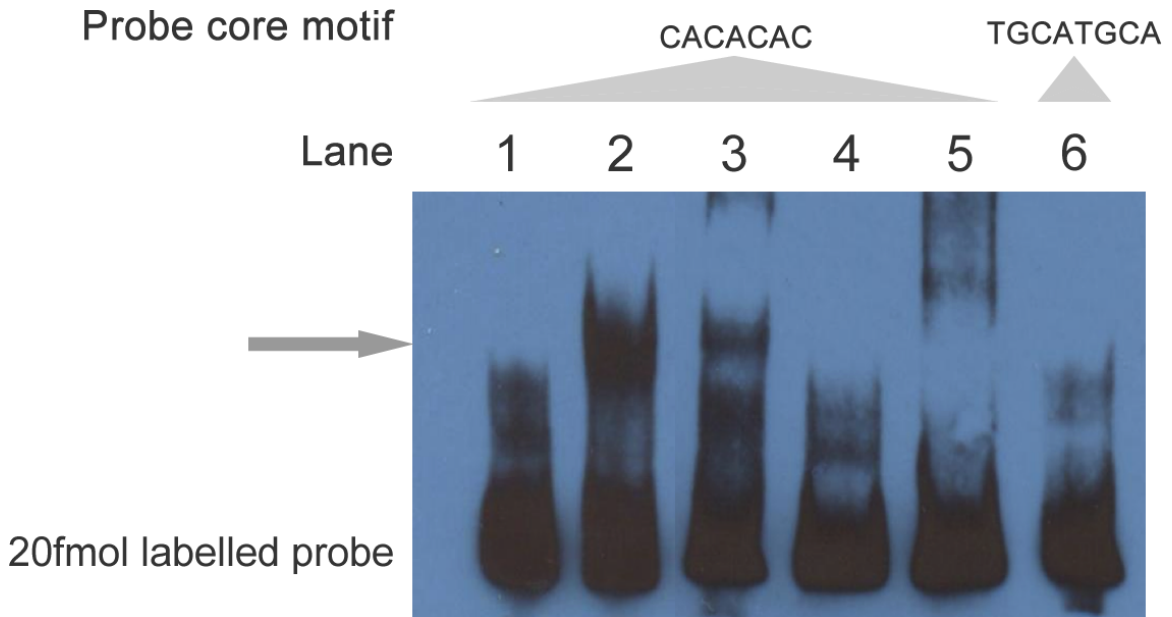

Supplement: pntd.0003933.s014.pdf [file pntd.0003933.s014.pdf]
